# Supplementary material for: Flexi-pharma: a molecule-ranking strategy for virtual screening using pharmacophores from ligand-free conformational ensembles
Source: PubMed Central journal article supplement (PMC7449997; doi:10.1007/s10822-020-00329-7), 2020-07-12
Supplement: 10822_2020_329_MOESM1_ESM.pdf [file 10822_2020_329_MOESM1_ESM.pdf]

Supplementary Information  
Flexi-pharma: a molecule-ranking strategy for  
virtual screening using pharmacophores from  
ligand-free conformational ensembles

Isaias Lans<sup>1</sup>, Karen Palacio-Rodríguez<sup>1</sup>, Claudio N.  
Cavasotto<sup>2,3,4</sup>, and Pilar Cossio<sup>1,5,\*</sup>

<sup>1</sup>Biophysics of Tropical Diseases Max Planck Tandem Group,  
University of Antioquia, Medellín, Colombia

<sup>2</sup>Computational Drug Design and Biomedical Informatics  
Laboratory, Translational Medicine Research Institute (IIMT),  
CONICET-Universidad Austral, Pilar, Buenos Aires,  
Argentina

<sup>3</sup>Facultad de Ciencias Biomédicas, and Facultad de Ingeniería,  
Universidad Austral, Pilar, Buenos Aires, Argentina

<sup>4</sup>Austral Institute for Applied Artificial Intelligence,  
Universidad Austral, Pilar, Buenos Aires, Argentina

<sup>5</sup>Department of Theoretical Biophysics, Max Planck Institute  
of Biophysics, 60438, Frankfurt am Main, Germany

\*Corresponding author: pilar.cossio@biophys.mpg.de

June 20, 2020

# 1 Supplementary Tables

Table S1: Centers of the three active spaces used for each benchmark system. The first four are the training set and the following systems correspond to the test set.

| System | Centers for the active spaces               |
|--------|---------------------------------------------|
| CDK2   | O-Glu81, N-Leu83 and CG-Leu134              |
| ER     | CB-Ala350, OE1-Glu353 and NH2-Arg394        |
| COX    | O-Ser353, O-Leu352 and CD2-Leu531           |
| GAR    | CD1-Leu85, ND2-Asn106 and CG1-Val139        |
| KITH   | CZ-Tyr187, CD1-Leu124 and N-Arg180          |
| FABP4  | OH-Tyr128, CZ-Phe16 and NH2-Arg106          |
| PA2GA  | ND1His47, CE2-Phe5 and CA-Leu2              |
| NRAM   | OH-Tyr409, CD-Arg223 and O-Trp177           |
| FA7    | OG-Ser195, OG-Ser19 and CG-His57            |
| HSP90a | CG-Phe138, SD-Met98 and CD1-Leu107          |
| AMPC   | NZ-Lys67, O-Ala318 and CE1-Tyr150           |
| FKB1A  | CE2-Trp59, OH-Tyr82 and CZ-Phe99            |
| ITAL   | CD1-Ile235, CZ-Tyr257 and CG1-Val157        |
| HXK4   | CD1-Ile211, CG1-Val62 and CE-Met235         |
| TRY    | OG-Ser195, O-Ser214 and S190OG              |
| ACE    | O-His440, CZ-Phe330 and CE3-Trp84           |
| HIV    | OD1(A)-Asp25, CD1(A)-Ile84 and CD1(B)-Ile84 |
| PARP1  | OD1-Asp105, CZ-Tyr246 and CZ-TyrY228        |
| KIT    | CD1-Leu799, SG-Cys809 and CG2-Val603        |
| LCK    | OD1-Asn369, CD1-Leu371 and CD1-Leu251       |

Table S2: First set of template-ligands used in Pharmagist [1, 2]. These consists of three ligands not included in the compound library or the used crystal structures. The ligand in the first row was used as pivot.

| CDK2                                                                                | ER                                                                                  | COX                                                                                  | GAR                                                                                   |
|-------------------------------------------------------------------------------------|-------------------------------------------------------------------------------------|--------------------------------------------------------------------------------------|---------------------------------------------------------------------------------------|
| 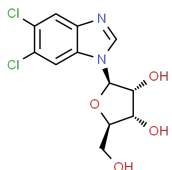   |    |    |    |
| ZINC28393967                                                                        | ZINC33360187                                                                        | ZINC13583263                                                                         | ZINC14979160                                                                          |
|  |  |  |  |
| ZINC38994180                                                                        | ZINC208243905                                                                       | ZINC323                                                                              | ZINC29239617                                                                          |
|  |  |  |  |
| ZINC12504093                                                                        | ZINC16051697                                                                        | ZINC4617749                                                                          | ZINC29246271                                                                          |

Table S3: Second set of template-ligands used in Pharmagist [1, 2]. These consists of two ligands from the two crystallographic structures for each system of the training set (first two rows), and a ligand chosen randomly from the compound library. The third ligand was selected randomly 5 times (last five rows). The ligand in the first row was used as pivot.

| CDK2                                                                                | ER                                                                                  | COX                                                                                  | GAR                                                                                   |
|-------------------------------------------------------------------------------------|-------------------------------------------------------------------------------------|--------------------------------------------------------------------------------------|---------------------------------------------------------------------------------------|
| 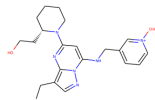   |    |    |    |
| 4KD1-ligand                                                                         | 1XP9-ligand                                                                         | 3KK6-ligand                                                                          | 1NJS-ligand                                                                           |
|    |    |    |    |
| 1FVV-ligand                                                                         | 3ERT-ligand                                                                         | 2OYU-ligand                                                                          | 1RC0-ligand                                                                           |
|  |  |  |  |
| ZINC582575                                                                          | ZINC1530090                                                                         | ZINC3814735                                                                          | ZINC27880441                                                                          |
|  |  |  |  |
| ZINC03814439                                                                        | ZINC3996033                                                                         | ZINC40891852                                                                         | ZINC26505012                                                                          |
|  |  |  |  |
| ZINC5988650                                                                         | ZINC13494225                                                                        | ZINC13581328                                                                         | ZINC26580280                                                                          |
|  |  |  |  |
| ZINC3814473                                                                         | CHEMBL3916194                                                                       | ZINC100658452                                                                        | ZINC1637602                                                                           |
|  |  |   |  |
| ZINC20149036                                                                        | ZINC383800                                                                          | ZINC13558285                                                                         | ZINC13737687                                                                          |

Table S4: EFs obtained after implementing the Flexi-pharma over two crystallographic structures of CDK2. The EFs were obtained at different threshold values. Note that the ranking-by-vote strategy is not performed in these cases.

| 4KD1      |     |          |            |          | 1FVV      |     |          |            |          |
|-----------|-----|----------|------------|----------|-----------|-----|----------|------------|----------|
| Threshold | EF  | #ligands | #molecules | EF level | Threshold | EF  | #ligands | #molecules | EF level |
| 0.3       | 1.3 | 12       | 346        | 19%      | 0.3       | 1.2 | 12       | 372        | 20%      |
| 0.5       | 1.1 | 20       | 670        | 37%      | 0.5       | 1.4 | 24       | 606        | 33%      |
| 0.7       | 1.1 | 32       | 739        | 40%      | 0.7       | 1.4 | 29       | 747        | 41%      |
| 0.9       | 1.1 | 35       | 1217       | 67%      | 0.9       | 1.1 | 32       | 1026       | 56%      |
| 1.1       | 1.0 | 37       | 1320       | 72%      | 1.1       | 1.1 | 42       | 1398       | 76%      |

Table S5: EFs obtained after implementing the Flexi-pharma over two crystallographic structures of ER. The EFs were obtained at different threshold values. Note that the ranking-by-vote strategy is not performed in these cases.

| 1XP9      |     |          |            |          | 3ERT      |     |          |            |          |
|-----------|-----|----------|------------|----------|-----------|-----|----------|------------|----------|
| Threshold | EF  | #ligands | #molecules | EF level | Threshold | EF  | #ligands | #molecules | EF level |
| 0.3       | 0.4 | 6        | 766        | 12%      | 0.3       | 0.6 | 11       | 878        | 13%      |
| 0.5       | 0.3 | 15       | 2398       | 36%      | 0.5       | 1.3 | 114      | 4345       | 66%      |
| 0.7       | 1.3 | 114      | 4484       | 67%      | 0.7       | 1.5 | 117      | 3839       | 57%      |
| 0.9       | 1.1 | 125      | 5853       | 88%      | 0.9       | 1.3 | 129      | 4828       | 72%      |
| 1.1       | 1.1 | 125      | 6180       | 92%      | 1.1       | 1.3 | 132      | 4952       | 74%      |

Table S6: EFs obtained after implementing the Flexi-pharma over two crystallographic structures of COX. The EFs were obtained at different threshold values. Note that the ranking-by-vote strategy is not performed in these cases.

| 2OYU      |     |          |            |          | 3KK6      |     |          |            |          |
|-----------|-----|----------|------------|----------|-----------|-----|----------|------------|----------|
| Threshold | EF  | #ligands | #molecules | EF level | Threshold | EF  | #ligands | #molecules | EF level |
| 0.3       | 2.8 | 16       | 353        | 5%       | 0.3       | 0.0 | 0.0      | 11         | 0%       |
| 0.5       | 2.5 | 34       | 837        | 12%      | 0.5       | 1.8 | 9        | 301        | 4%       |
| 0.7       | 1.9 | 36       | 1153       | 16%      | 0.7       | 1.5 | 9        | 365        | 5%       |
| 0.9       | 2.0 | 47       | 1455       | 20%      | 0.9       | 1.7 | 42       | 1523       | 21%      |
| 1.1       | 2.1 | 66       | 1894       | 26%      | 1.1       | 1.5 | 47       | 1929       | 27%      |

Table S7: EFs obtained after implementing the Flexi-pharma over two crystallographic structures of GAR. The EFs were obtained at different threshold values. Note that the ranking-by-vote strategy is not performed in these cases.

| 1NJS      |     |         |            |          | 1RC0      |      |         |            |          |
|-----------|-----|---------|------------|----------|-----------|------|---------|------------|----------|
| Threshold | EF  | #ligand | #molecules | EF level | Threshold | EF   | #ligand | #molecules | EF level |
| 0.3       | 1.8 | 37      | 1134       | 41%      | 0.3       | 18.3 | 1       | 3          | 0%       |
| 0.5       | 1.6 | 43      | 1516       | 55%      | 0.5       | 0.8  | 5       | 329        | 12%      |
| 0.7       | 1.1 | 40      | 2009       | 73%      | 0.7       | 1.0  | 35      | 1882       | 69%      |
| 0.9       | 1.1 | 40      | 2023       | 74%      | 0.9       | 0.9  | 32      | 2026       | 74%      |
| 1.1       | 1.1 | 49      | 2371       | 86%      | 1.1       | 1.1  | 41      | 2099       | 77%      |

## 2 Supplementary Figures

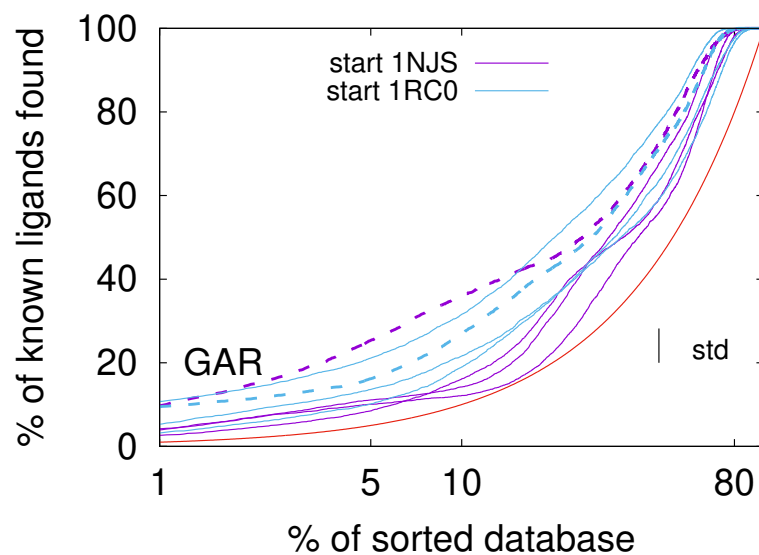

Figure S1: Enrichment plots after applying Flexi-pharma for 2 additional MD replicas starting from the two crystal structures 1NJS and 1RC0 for GAR (dashed lines). For reference, the three initial replicas per starting crystal are shown in solid lines (same data as main text Figure 5 bottom-left). Each simulation was 10 ns long, and 100 equidistant frames were selected to apply the Flexi-pharma protocol. Bootstrapping was used to calculate the average EPs for each trajectory. The Flexi-pharma protocol was applied using a grid-percentage threshold value of 0.7%. The x-axis is in logarithmic scale.

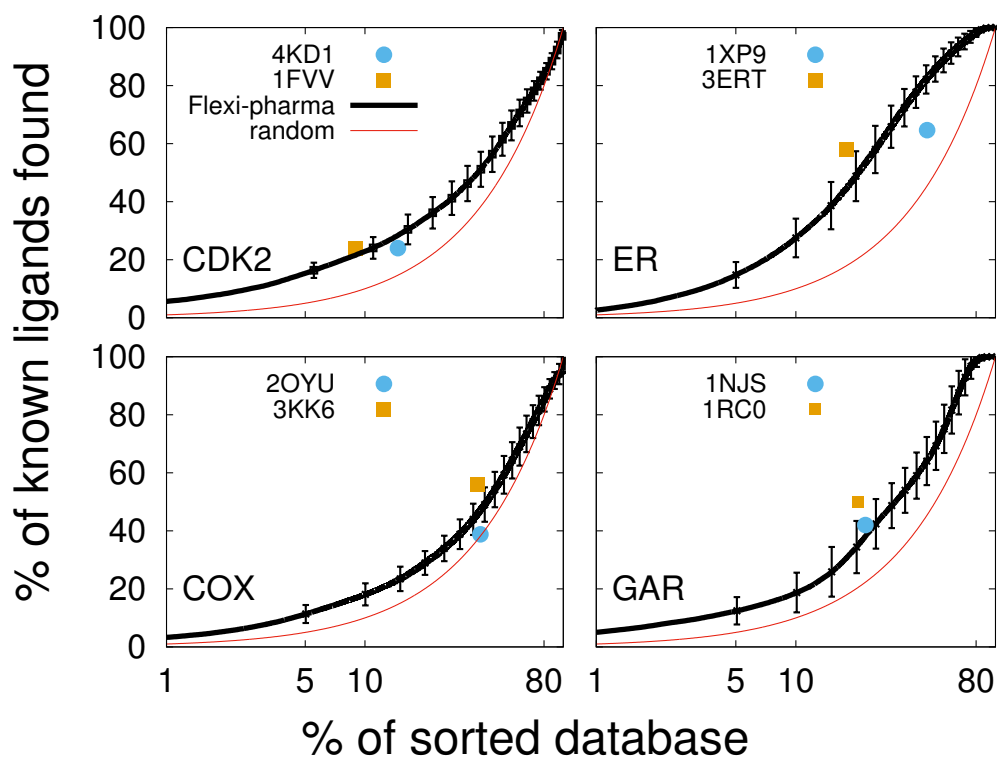

Figure S2: Comparison between the EP obtained with Flexi-pharma (black line) and the results from Pharmit [3]. The point corresponds to the % of molecules filtered versus the % of ligands found by applying Pharmit using each crystallographic structure.



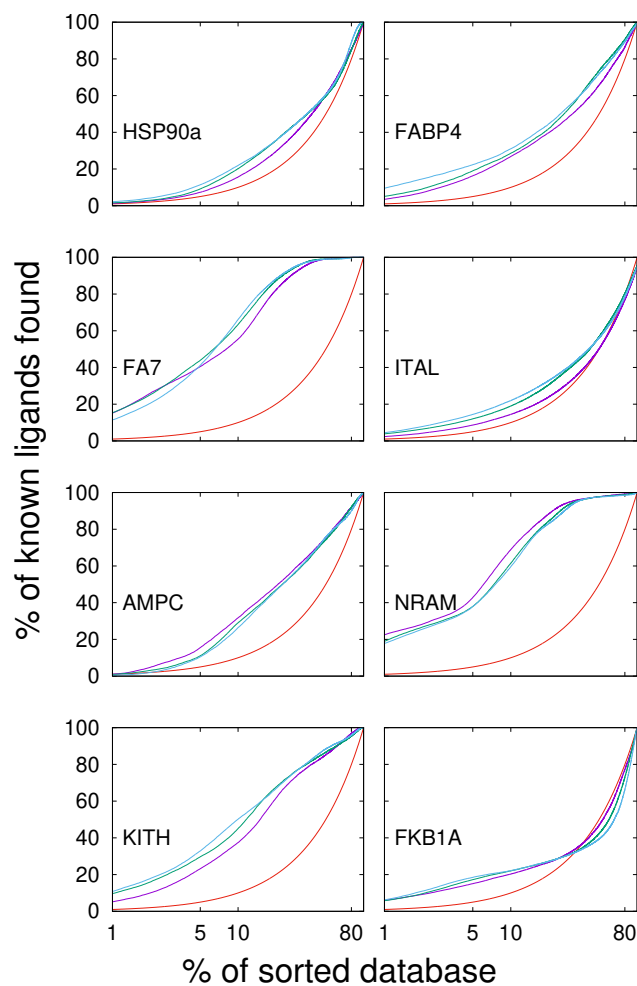

Figure S3: Average enrichment plot obtained after applying Flexi-pharma for 8 test systems: HSP90a (PDB 1UYG), FABP4 (PDB 2NNQ), FA7 (PDB 1W7X), ITAL (PDB 2ICA), AMPC (PDB 1L2S), NRAM (PDB 1B9V), KITH (PDB 2B8T), and FKB1A (PDB 1J4H). The MD simulations were 10 ns long. From each trajectory, 100 equidistant frames were selected, and the Flexi-pharma protocol was applied. The simulations were triplicated by assigning random initial velocities. The list of votes is used to calculate the EPs. Bootstrapping analysis was performed by sampling with replacement 100 times to obtain the average EP and standard deviation. The Flexi-pharma protocol was applied using a grid-percentage threshold value of 0.7% (green), 0.5% (blue) and 0.3% (violet). The x-axis is in logarithmic scale.

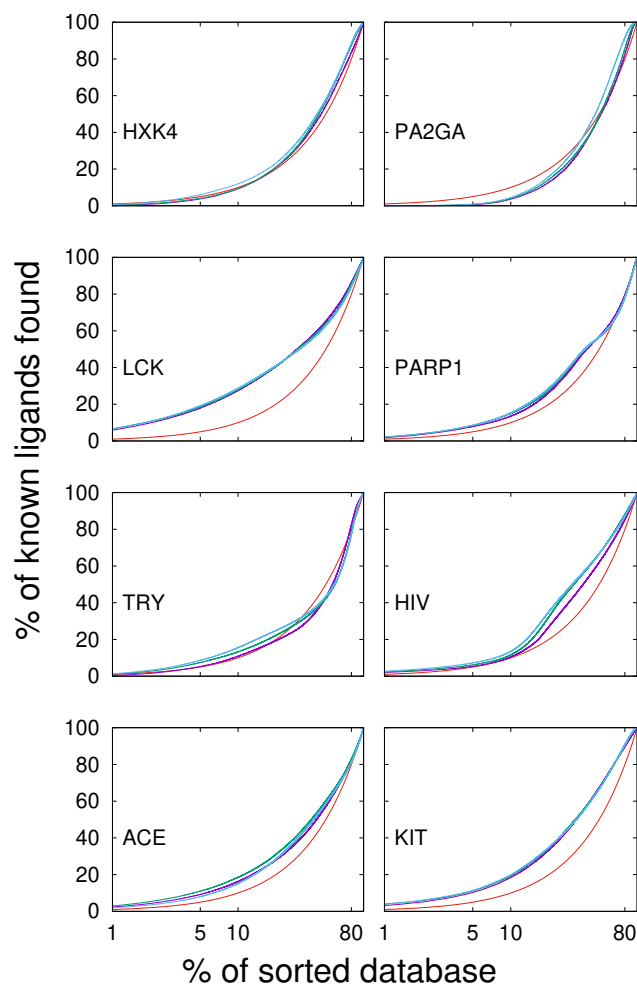

Figure S4: Average enrichment plot obtained after applying Flexi-pharma for 8 systems: HXK4 (PDB 3F9M), PA2GA (PDB 1KVO), LCK (PDB 2OF2), PARP1 (PDB 3L3M), TRY (PDB 2AYW), HIV (PDB 1XL2), ACE (PDB 1E66), and KIT (PDB 3G0E). The MD setup and Flexi-pharma parameters are the same as for Figure S3. The Flexi-pharma protocol was applied using a grid-percentage threshold value of 0.7% (green), 0.5% (blue) and 0.3% (violet). The x-axis is in logarithmic scale.

## References

- [1] O. Dror, D. Schneidman-Duhovny, Y. Inbar, R. Nussinov, H.J. Wolfson, *Journal of Chemical Information and Modeling* **49**(10), 2333 (2009)
- [2] D. Schneidman-Duhovny, O. Dror, Y. Inbar, R. Nussinov, H.J. Wolfson, *Nucleic Acids Research* **36**(Web Server), W223 (2008)
- [3] J. Sunseri, D.R. Koes, *Nucleic acids research* **44**(W1), W442 (2016)
